# Supplementary material for: Heat shock protein 90 is downregulated in calcific aortic valve disease
Source: Springer Nature journal article supplement (doi:10.1186/s12872-019-01294-2), 2019-12-01
Supplement: MOESM1 [file 23188478]

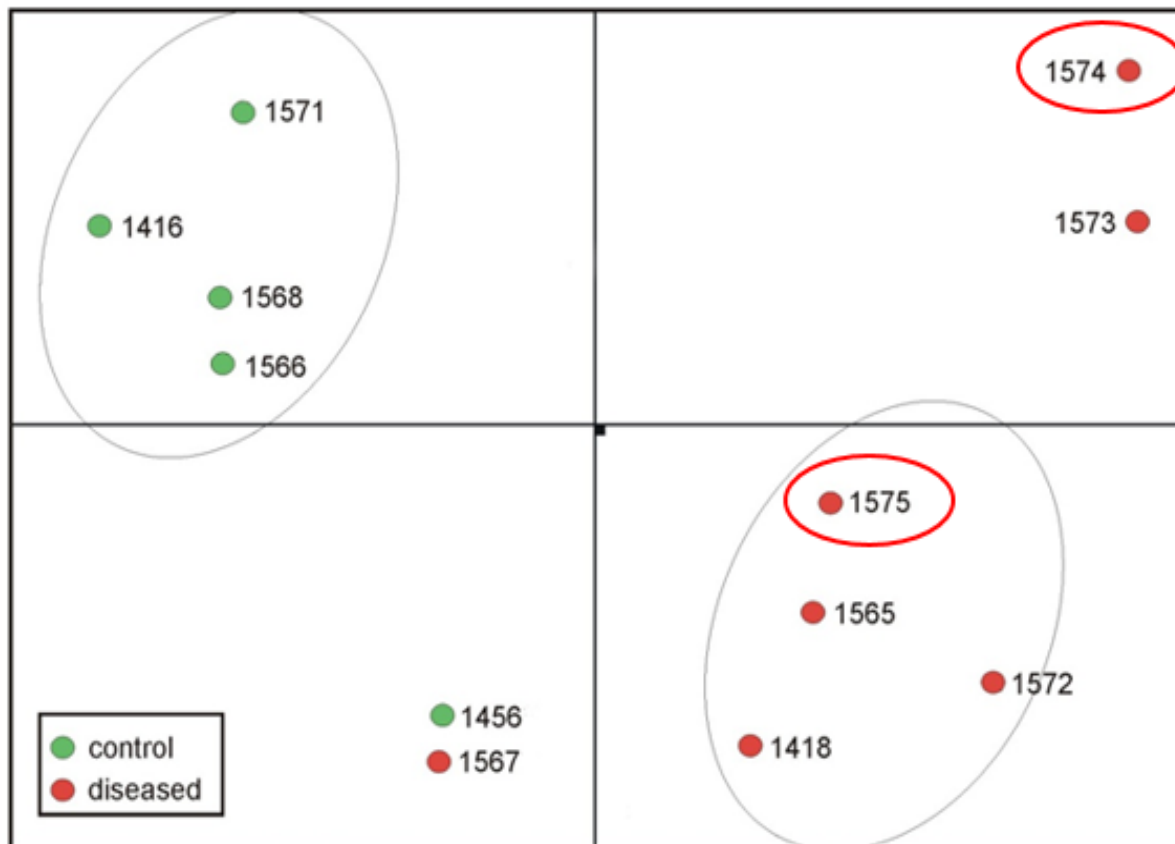

Supplemental Figure 1. An unsupervised clustering analysis (principal component analysis, PCA) on the raw proteomic data was performed to test if valvular anatomy impact on our data. PCA shows the clearest distinction emerges between control, and aortic stenotic group (diseased). Bicuspid valves (1574 and 1575, circulated with red colour) do not cluster together and distinctly from tricuspid valves.
