# Supplementary material for: Heat shock protein 90 is downregulated in calcific aortic valve disease
Source: Springer Nature journal article supplement (doi:10.1186/s12872-019-01294-2), 2019-12-01
Supplement: MOESM2 [file 23188478]

A

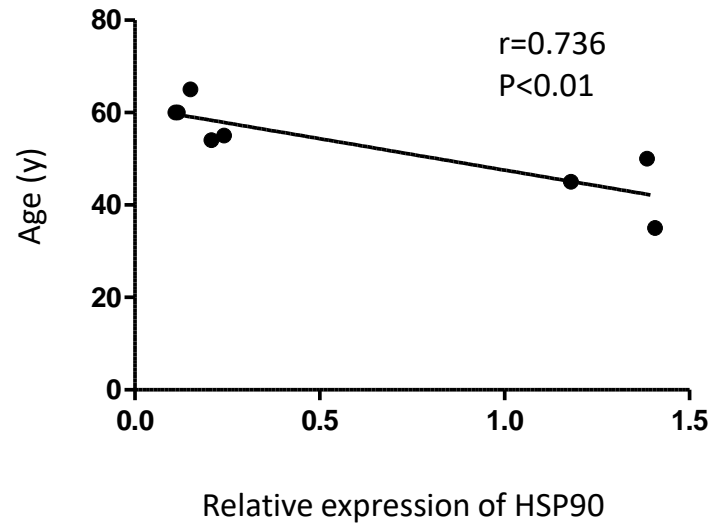

B

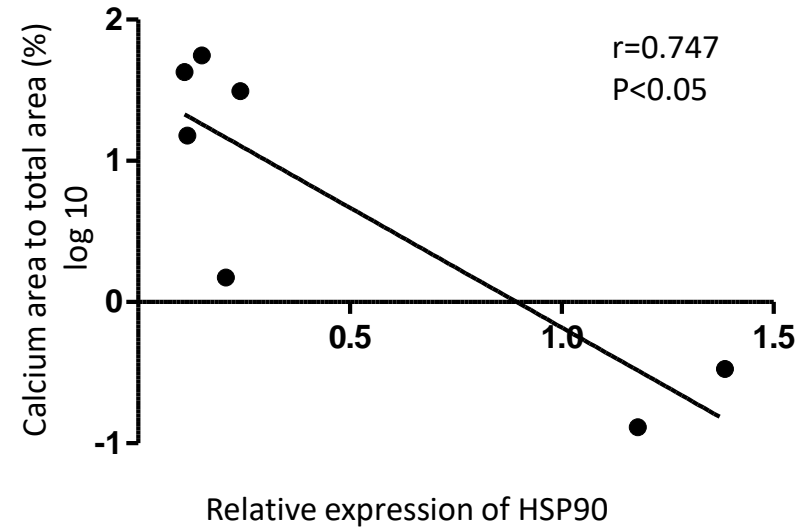

C

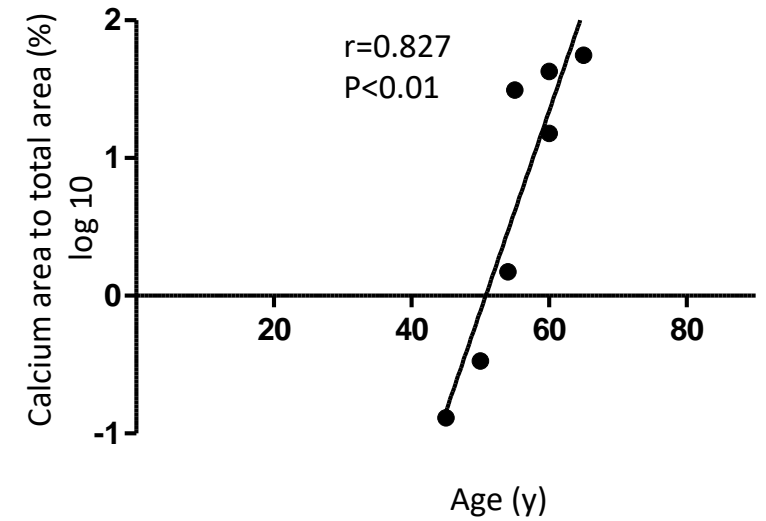

Supplemental figure 2. Correlations between heat-shock protein 90 (HSP90), age of the patients and calcification of the valves. A) HSP90 correlated with the age of the patients (y). Additionally, B) calcium area of the total valve area (%) correlated with the relative expression of HSP90 C) The age of the patients correlated with calcium area of the total valve area.
